# Supplementary material for: Comparison of Fitness Cost, Stability, and Conjugation Frequencies of tet(X4)-Positive Plasmids in Chicken and Pig Escherichia coli
Source: MDPI journal article supplement (doi:10.3390/antibiotics11111657), 2022-11-19
Supplement: s1 [file s1]

## Supplementary Materials

**Table S1.** Basic information of pig or chicken *E. coli* strains involved in this study.

|       | ST type | Isolation position | Isolation time   | Serotype | FimH type |
|-------|---------|--------------------|------------------|----------|-----------|
| SEC10 | ST88    | Jinan, China       | January 25, 2005 | O8:H9    | fimH39    |
| SEC78 | -       | Rizhao, China      | January 26, 2005 | -        | -         |
| E847  | ST155   | Gaoyou, China      | April 16, 2002   | O8:H51   | fimH32    |
| E901  | ST1196  | Yangzhou, China    | April 10, 2011   | O173:H28 | fimH31    |

**Table S2.** MICs (mg/L) of four selected *E. coli* strains.

|       | MIC (μg/mL) |     |       |      |      |     |     |       |      |       |     |
|-------|-------------|-----|-------|------|------|-----|-----|-------|------|-------|-----|
|       | TIG         | KAN | COL   | AMP  | ENR  | CTE | FFC | MEM   | OXY  | CFF   | TET |
| SEC10 | ≤0.25       | 8   | ≤0.25 | >128 | 16   | 64  | 4   | ≤0.25 | >128 | ≤0.25 | 128 |
| SEC78 | ≤0.25       | >64 | ≤0.25 | >128 | 8    | 32  | 32  | ≤0.25 | 128  | ≤0.25 | 128 |
| E847  | ≤0.25       | 8   | ≤0.25 | >128 | ≤0.5 | 64  | 4   | ≤0.25 | >128 | 0.5   | 128 |
| E901  | ≤0.25       | >64 | ≤0.25 | >128 | 32   | 32  | 8   | ≤0.25 | 128  | 128   | 64  |

TIG Tigecycline, KAN Kanamycin, COL Colistin, AMP Ampicillin, ENR Enrofloxacin, CTE Chlorotetracycline, FFC Florfenicol, MEM Meropenem, OXY Oxytetracycline, CFF Ceftiofur, TET Tetracycline.

**Table S3.** Basic information of *tet*(X4)-bearing plasmids in this study.

|                    | Names in original study | Names in this study | Size   | Replicon type                             | Reference |
|--------------------|-------------------------|---------------------|--------|-------------------------------------------|-----------|
| Pig slaughterhouse | pRF14-1_50k_tetX        | C3                  | 50518  | IncX1                                     | [4]       |
|                    | pRF173-2_87k_tetX       | C42                 | 87445  | IncA/C2                                   | [4]       |
|                    | pRF2-1_117k_tetX        | C41                 | 117635 | IncF II                                   | [4]       |
|                    | pRS3-2_194k_tetX_flye   | C81                 | 194164 | IncFIA(HI1), IncHI1A, IncHI1B(R27)        | [4]       |
|                    | pRW7-1_235k_tetX        | C54                 | 235947 | IncFIA(HI1), IncHI1A, IncHI1B(R27), IncX1 | [4]       |
| Chicken feces      | pHNCF11W_tetX           | 11W                 | 57105  | IncX1                                     | [18]      |
